# Supplementary material for: Poisoning effect diminished on a novel PdHoOx/C catalyst for the electrooxidation of formic acid
Source: Royal Society of Chemistry journal article supplement (doi:10.1039/c1cc16522d), 2011-10-26
Supplement: c1cc16522d.pdf [file c1cc16522d.pdf]

## Posioning effect diminished on novel PdHoO<sub>x</sub>/C catalyst for the electrooxidation of formic acid

Ligang Feng, Xiujuan Sun, Changpeng Liu, Wei Xing\*

### Experimental Section

Preparation of HoO<sub>x</sub>/C hybrid support: A proper amount of Ho<sub>2</sub>O<sub>3</sub> was initially dissolved in 10 mL of concentrated HNO<sub>3</sub> and diluted in 50 mL of distilled water and ethanol (1:1 in volume ratio). Next, a given amount of Vulcan XC-72 carbon was added into the above solution; the solution was sonicated for an hour and kept at room temperature (20 °C ) under vigorous agitation for 2 hours. After stirring, 0.5 M Na<sub>2</sub>CO<sub>3</sub> and 2 M NaOH solution was added into the mixture to form precipitates. Subsequently, the suspension was stirred over night and finally filtered and the solid was transferred to a tubular oven at 550 °C for 3 hours to obtain stable HoO<sub>x</sub>/C support under the protection of nitrogen.

Synthesis of PdHoO<sub>x</sub>/C catalysts: Firstly, a given amount of HoO<sub>x</sub>/C hybrid support and H<sub>2</sub>PdCl<sub>4</sub> solution were ultrasonically dispersed in 50 ml of ethylene-glycol. And then the pH value of the suspension was adjusted by 2 M NaOH solution to ca. 11 under ultrasonication. After that, the suspension was kept at room condition for 2 hours. The suspension was then exposed in the middle of a microwave oven (LG MG-5021MW1, 2450 MHz) for 60 s at 700 W and cooled down to room temperature naturally. Finally, the suspension was filtered, washed and dried overnight at 80 °C in a vacuum oven. The content of Ho and Pd were 15% and 20%,

respectively. As a comparison, Pd/C catalyst was also synthesized by the same method. All solutions were prepared using Millipore-MiliQ water and analytical-grade reagents.

### **Catalyst characterization**

The X-ray diffraction (XRD) patterns were obtained using a Rigaku-D/MAX-PC 2500 X-ray diffractometer with the Cu K $\alpha$  ( $\lambda=1.5405\text{\AA}$ ) as a radiation source operating at 40 kV and 200 mA. The composition of catalysts was determined by energy dispersive X-ray analysis (EDX) on a JEOL JAX-840 scanning electron microscope operating at 20 kV. XPS was recorded on a Kratos XSAM-800 spectrometer with an Al K $\alpha$  monochromatic source. The transmission electron microscope (TEM) images were obtained by using a JEOL 2010 microscope operating at 200 kV.

The electrochemical measurements were performed with an EG&G Par potentiostat/galvanostat (Model 273A Princeton Applied Research Co. USA) and a conventional three compartment electrochemical cell. A Pt plate and Ag/AgCl electrode were used as the counter and reference electrodes, respectively. All the potentials were quoted against the reference Ag/AgCl electrode. All electrochemical measurements were carried out in 0.5 M H<sub>2</sub>SO<sub>4</sub> solution with or without 0.5 M HCOOH deaerated by pure nitrogen for 15 min before experiments. The working electrode was prepared as follows: First, 5 mg of the catalyst was dispersed ultrasonically in 1 mL of the alcohol solution containing 50 mL of Nafion solution (5 wt%, Aldrich Co. USA). Second, 10  $\mu$ L of the above solution was pipetted and spread

on a mirrorfinished glassy carbon electrode with 3 mm diameter. At last, it was dried at room temperature for 30 min. The glassy carbon electrode was polished with alumina slurry of 0.5 and 0.03  $\mu\text{m}$  successively before use. The apparent surface area of the glassy carbon electrode was 0.07  $\text{cm}^2$ .

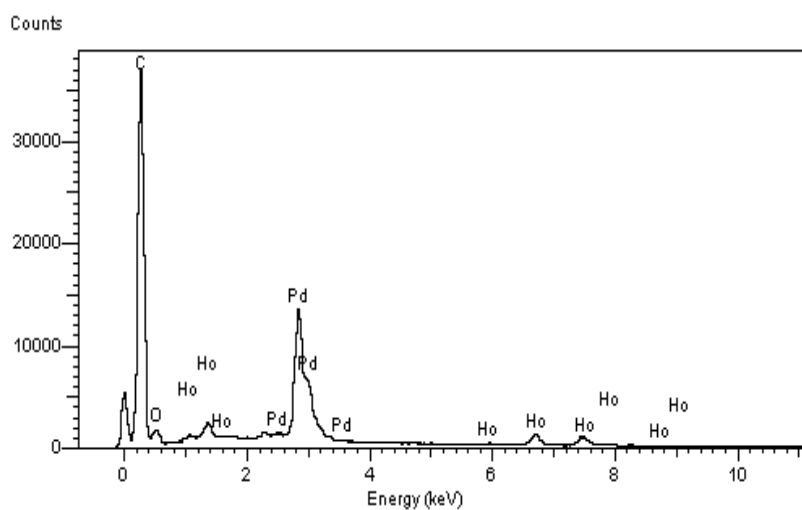

Fig.S1. EDX spectra of PdHoO<sub>x</sub>/C catalyst.

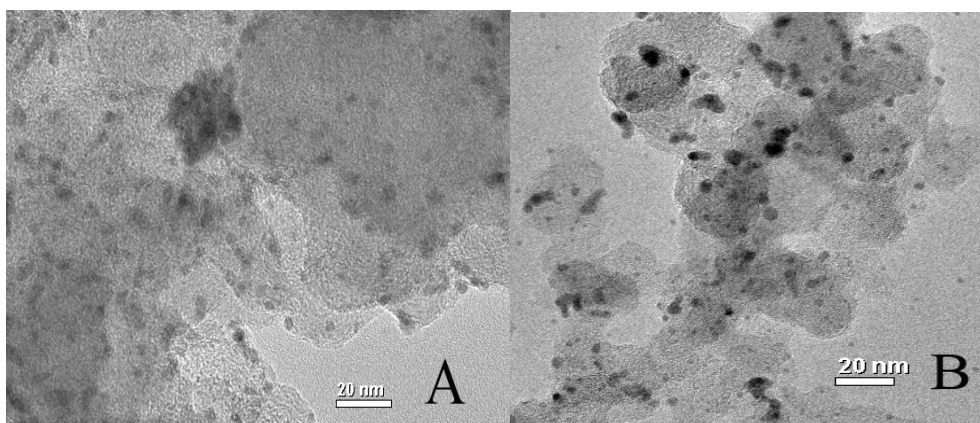

Fig.S2. TEM images of PdHoOx/C catalyst (A) and Pd/C-H catalyst (B).

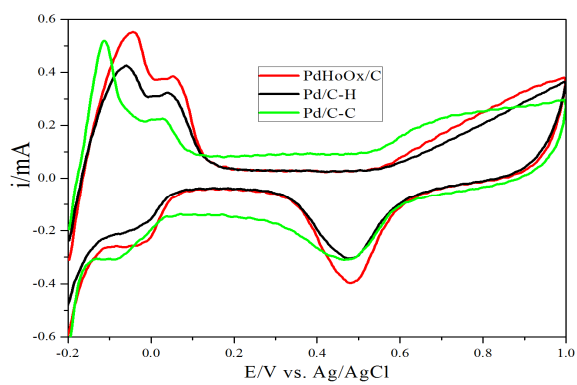

Fig.S3. Cyclic voltammograms of the PdHoOx/C, Pd/C-H and Pd/C-C catalysts with a scan rate of  $50 \text{ mV s}^{-1}$  in  $0.5 \text{ M H}_2\text{SO}_4$ .

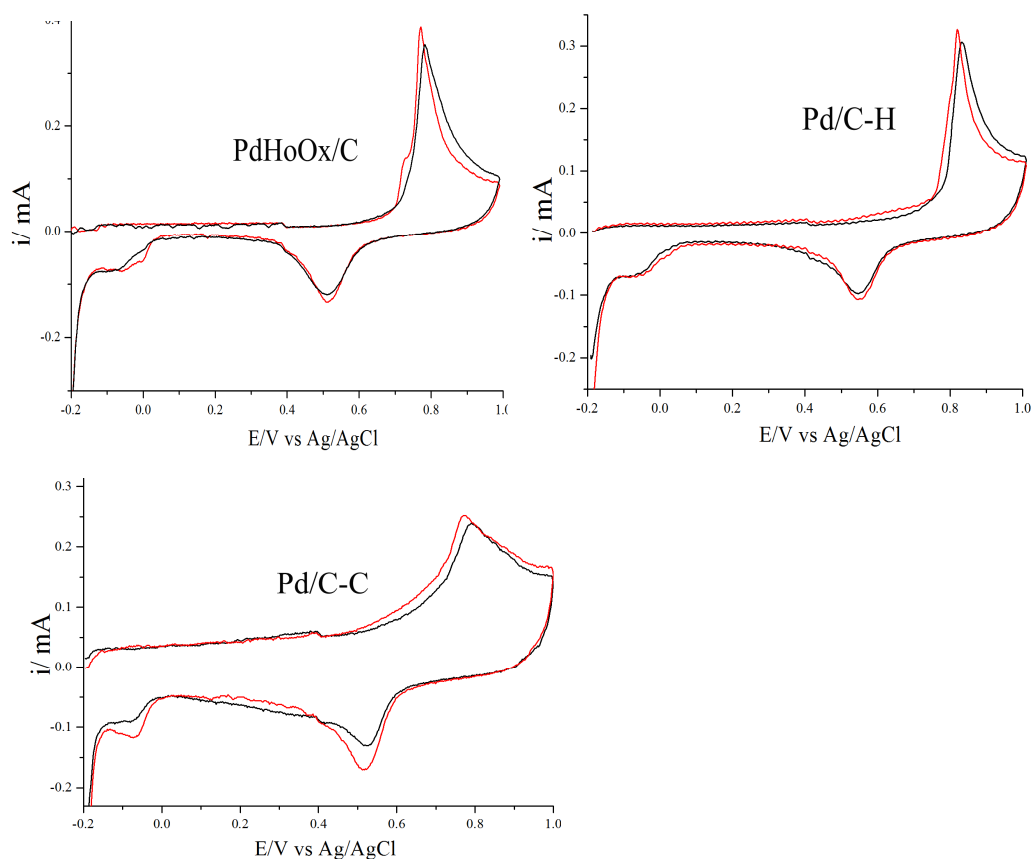

Fig.S4. The CO stripping voltammograms for the PdHoOx/C, Pd/C-H and Pd/C-C catalysts with a scan rate of  $50 \text{ mV s}^{-1}$ .
